1 **Evolution trajectories of snake genes and genomes revealed by comparative analyses**  
2 **of five-pacer viper**

3 Wei Yin<sup>1,\*</sup>, Zong-ji Wang<sup>2,3,4,5,\*</sup>, Qi-ye Li<sup>3,4,6</sup>, Jin-ming Lian<sup>3</sup>, Yang Zhou<sup>3</sup>, Bing-zheng  
4 Lu<sup>7</sup>, Li-jun Jin<sup>3</sup>, Peng-xin Qiu<sup>7</sup>, Pei Zhang<sup>3</sup>, Wen-bo Zhu<sup>7</sup>, Bo Wen<sup>8</sup>, Yi-jun Huang<sup>7</sup>,  
5 Zhi-long Lin<sup>8</sup>, Bi-tao Qiu<sup>3,9</sup>, Xing-wen Su<sup>7</sup>, Huan-ming Yang<sup>8,9</sup>, Guo-jie Zhang<sup>3,4,10</sup>,  
6 Guang-mei Yan<sup>7,#</sup>, Qi Zhou<sup>2,11,#</sup>

7

8 1. Department of Biochemistry, Zhongshan School of Medicine, Sun Yat-sen University,  
9 Guangzhou, 510089, China.

10 2. Life Sciences Institute, The Key Laboratory of Conservation Biology for Endangered  
11 Wildlife of the Ministry of Education, Zhejiang University, Hangzhou, 310058,  
12 China.

13 3. China National Genebank, BGI-Shenzhen, Shenzhen, 518083, China.

14 4. State Key Laboratory of Genetic Resources and Evolution, Kunming Institute of  
15 Zoology, Chinese Academy of Sciences, Kunming, China.

16 5. School of Bioscience & Bioengineering, South China University of Technology,  
17 Guangzhou, 510006, China.

18 6. Centre for GeoGenetics, Natural History Museum of Denmark, University of  
19 Copenhagen, Øster Voldgade 5–7, 1350 Copenhagen K, Denmark.

20 7. Department of Pharmacology, Zhongshan School of Medicine, Sun Yat-sen  
21 University, Guangzhou, 510089, China.

22 8. BGI-Shenzhen, Shenzhen, 518083, China.

23 9. James D. Watson Institute of Genome Sciences, Hangzhou 310058, China

24 10. Centre for Social Evolution, Department of Biology, University of Copenhagen,  
25 Universitetsparken 15, DK-2100 Copenhagen, Denmark.

26 11. Department of Integrative Biology, University of California, Berkeley, Berkeley,  
27 CA94720, United States

28 \* These authors contributed equally to the work

29 # To whom correspondence should be addressed: [zhouqi1982@zju.edu.cn](mailto:zhouqi1982@zju.edu.cn) or

30 [ygm@mail.sysu.edu.cn](mailto:ygm@mail.sysu.edu.cn)

31 **Abstract**

32 Snake's numerous fascinating features distinctive from other tetrapods necessitate a rich  
33 history of genome evolution that is still obscure. To address this, we report the first  
34 high-quality genome of a viper, *Deinagkistrodon acutus* and comparative analyses using  
35 other species from major snake and lizard lineages. We map the evolution trajectories of  
36 transposable elements (TEs), developmental genes and sex chromosomes onto the snake  
37 phylogeny. TEs exhibit dynamic lineage-specific expansion. **And in the viper many TEs**  
38 **may have been rewired into the regulatory network of brain genes, as shown by their**  
39 **associated expression with nearby genes in the brain but not in other tissues.** We detect  
40 signatures of adaptive evolution in olfactory, venom and thermal-sensing genes, and also  
41 functional degeneration of genes associated with vision and hearing. **Many *Hox* and *Tbx***  
42 **limb-patterning genes show evidence of relaxed selective constraints, and such genes'**  
43 **phylogenetic distribution supports fossil evidence for a successive loss of forelimbs then**  
44 **hindlimbs during the snake evolution.** Finally, we infer that the Z and W sex  
45 chromosomes **had undergone at least three recombination suppression events at the**  
46 **ancestor of advanced snakes,** with the W chromosomes showing a gradient of  
47 degeneration from basal to advanced snakes. These results, together with all the genes  
48 identified as undergoing adaptive or degenerative evolution episodes at respective snake  
49 lineages forge a framework for our deep understanding into snakes' molecular evolution  
50 history.

51 Snakes have undergone massive adaptive radiation with ~3400 extant species  
52 successfully inhabiting almost all continents except for the polar regions<sup>1</sup>. This process  
53 has culminated in ‘advanced snakes’ (Caenophidia, ~3000 species), involved numerous  
54 evolutionary changes in body form, chemo-/thermo- perception, venom and sexual  
55 reproductive systems, which together distinguish snakes from majorities of other  
56 Squamates (lizards and worm lizards). Some of these dramatic changes can be tracked  
57 from fossils, which established that the ancestor of snakes had already evolved a  
58 elongated body plan, probably as an adaptation to a burrowing and crawling lifestyle, but  
59 had lost only the forelimbs<sup>2-4</sup>. Extant boa and python species retain rudimentary  
60 hindlimbs, while advanced snakes have completely lost them. The limblessness,  
61 accompanied by degeneration in visual and auditory perception have not compromised  
62 snakes’ dominant role as top predators, largely due to the evolution of infrared sensing  
63 and/or venom, and the development of corresponding facial pit and fangs (specialized  
64 teeth for venom injection) independently in different lineages<sup>5,6</sup>.

65 These extreme adaptations have sparked strong and standing interest into their  
66 genetic basis. Snakes are used as a model for studying various basic questions like  
67 mechanisms of axial patterning and limb development<sup>3,7,8</sup>, ‘birth-and-death’ of venom  
68 proteins<sup>9-11</sup>, and also sex chromosome evolution<sup>12</sup>. Cytogenetic findings in snakes first  
69 drove Ohno to propose that sex chromosomes in vertebrates evolved from ancestral  
70 autosomes<sup>13</sup>, like those of insects<sup>14</sup> and plants<sup>15</sup>. Our insights into these questions have  
71 been recently advanced by the application of next-generation sequencing. Analyses of  
72 python and king cobra genomes and transcriptomes have uncovered the metabolic gene  
73 repertoire involved in feeding, and inferred massive expansion and adaptive evolution of  
74 toxin families in elapids (an ‘advanced’ group)<sup>10,16</sup>. However, comparative studies of  
75 multiple snake genomes unraveling their evolutionary trajectories since the divergence  
76 from lizards are lacking, and so far only a few specific developmental ‘toolbox’ (e.g.,  
77 *Hox*<sup>7,17,18</sup> and Fgf signaling pathway<sup>19</sup>) genes have been studied between snakes and  
78 lizards. This hampers our comprehensive understanding into the molecular basis of  
79 stepwise or independent acquisition of snake specific traits. We bridge this gap here by  
80 deep-sequencing the genomes and transcriptomes of five-pacer viper (*Deinagkistrodon*

81 *acutus*, **Figure 1A**), a member of the Viperidae family. This pit viper is a paragon of  
82 infrared sensing, heteromorphic ZW sex chromosomes, and distinctive types of fangs and  
83 toxins (its common name exaggerates that victims can walk no more than five paces)  
84 from other venomous snake families<sup>6,20</sup>. Despite the intraspecific differences within the  
85 same family, comparative analyses to the available genomes of three other major snake  
86 family species, i.e., *Boa constrictor* (Boidae family)<sup>21</sup>, *Python bivittatus* (Pythonidae  
87 family)<sup>16</sup>, *Ophiophagus hannah* (Elapidae family)<sup>10</sup> and several reptile outgroups should  
88 recapitulate the major genomic adaptive or degenerative changes occurred in the ancestor  
89 and along individual branches of snake families, and would also promote current  
90 antivenom therapy and drug discovery (e.g., thrombolytics) out of the viper toxins<sup>22</sup>.

91

## 92 **Evolution of snake genome architecture**

93 We sequenced a male and a female five-pacer viper to extremely high-coverage (♀ 238  
94 fold, ♂114 fold, **Supplementary Table 1**), and estimated the genome size to be 1.43Gb  
95 based on k-mer frequency distribution<sup>23</sup> (**Supplementary Table 2, Supplementary**  
96 **Figure 1**). Fewer than 10% of the reads, which have a low quality or are probably  
97 derived from repetitive regions, were excluded from the genome assembly  
98 (**Supplementary Table 3**). We generated a draft genome using only male reads for  
99 constructing the contigs, and female long-insert (2kb~40kb) library reads for joining the  
100 contigs into scaffolds. It has an assembled size of 1.47Gb, with a slightly better quality  
101 than the genome using purely female reads. It has high continuity (contig N50: 22.42kb,  
102 scaffold N50: 2.12Mb) and integrity (gap content 5.6%, **Supplementary Table 4**), thus  
103 was chosen as the reference genome for further analyses. It includes a total of 21,194  
104 predicted protein-coding genes, as estimated using known vertebrate protein sequences  
105 and massive transcriptome data generated in this study from eight tissues (**Figure 1A,**  
106 **Materials and Methods**). For comparative analyses, we also annotated 17,392  
107 protein-coding genes in the boa genome (the SGA version from<sup>21</sup>). 80.84% (17,134) of  
108 the viper genes show robust expression (normalized expression level RPKM>1) in at  
109 least one tissue, comparable to the value of 70.77% in king cobra (**Supplementary Table**  
110 **5**). Based on 5,353 one-to-one orthologous gene groups of four snake species (five-pacer

111 viper, boa<sup>21</sup>, python<sup>16</sup>, king cobra<sup>10</sup>), green anole lizard<sup>24</sup> and several other sequenced  
112 vertebrate genomes (**Materials and Methods**), we constructed a phylogenomic tree with  
113 high bootstrapping values at all nodes (**Figure 1B**). We estimated that advanced snakes  
114 diverged from boa and python about 66.9 (47.2~84.4) million years ago (MYA), and  
115 five-pacer viper and king cobra diverged 44.9 (27.5~65.0) MYA assuming a molecular  
116 clock. These results are consistent with the oldest snake and viper fossils from 140.8 and  
117 84.7 MYA, respectively<sup>25</sup>.

118 The local GC content of snakes (boa and five-pacer viper) shows variation (GC  
119 isochores) similar to the genomes of turtles and crocodiles, and intermediate between  
120 mammals/birds and lizard (**Figure 1C, Supplementary Figure 2**), confirming the loss of  
121 such a genomic feature in lizard among tetrapods<sup>24</sup>. Cytogenetic studies showed like most  
122 other snakes, the five-pacer viper karyotype has  $2n=36$  (16 macro- and 20  
123 micro-chromosomes) chromosomes<sup>26</sup>, with extensive inter-chromosomal conservation  
124 with the lizard<sup>27</sup>. This enables us to organize 56.50% of the viper scaffold sequences into  
125 linkage groups, based on their homology with sequences of known green anole lizard  
126 macro-chromosomes (**Supplementary Table 6**). As expected, autosomal sequences have  
127 the same read coverage in both sexes, whereas scaffolds inferred to be located on the  
128 viper Z chromosome (homologous to green anole lizard chr6) have coverage in the  
129 female that is half that in the male (**Figure 1C**). Additionally, the frequency of  
130 heterozygous variants on the Z chromosome is much lower in the female than in the male  
131 (0.005% vs 0.08%,  $P$ -value $<2.2e-16$ , Wilcoxon signed rank test) due to the nearly  
132 hemizygous state of Z chromosome in female, while those of autosomes (~0.1%) are very  
133 similar between sexes. These results indicated that our assembly mostly assigns genes to  
134 the correct chromosome, and this is further supported by comparisons of 172 genes'  
135 locations with previous fluorescence *in situ* hybridization results (**Supplementary Data**  
136 **1**)<sup>27</sup>. They also suggest that the viper sex chromosomes are highly differentiated from  
137 each other (see below).

138 47.47% of the viper genome consists of transposable element sequences (TEs),  
139 higher than any other snakes so far analyzed (33.95~39.59%), which cannot be explained  
140 solely by the higher assembly quality than that of the other species genome

141 sequences<sup>10,16,21</sup> (**Supplementary Table 7-8**). These are mostly long interspersed  
142 elements (LINE, 13.84% of the genome) and DNA transposons (7.96%, **Supplementary**  
143 **Table 7**). Sequence divergence of individual families from inferred consensus sequences  
144 uncovered recent rampant activities in the viper lineage of LINES (CR1), DNA  
145 transposons (hAT and TcMar) and retrotransposons (Gypsy and DIRS). In particular,  
146 there is an excess of low-divergence (<10% divergence level) CR1 and hAT elements in  
147 the viper genome only (**Figure 2A**). We also inferred earlier propagation of TEs shared  
148 by viper and king cobra, which thus probably occurred in the ancestor of advanced  
149 snakes. Together, these derived insertions resulted in an at least three-fold difference in  
150 the CR1 and hAT content between viper and more basal-branching snakes like boa and  
151 python (**Figure 2B**). While boa and python have undergone independent expansion of L2  
152 and CR1 repeats, so that their overall LINE content is at a similar level to that of the  
153 viper and cobra (**Figure 2A, Supplementary Table 7**).

154       These TEs are presumably silenced through epigenetic mechanisms to prevent their  
155 deleterious effects of transposition or mediating genomic rearrangements. Indeed, very  
156 few are transcribed in all of the tissue examined, except, unexpectedly in brain (**Figure**  
157 **2C**). This brain-specific expression prompted us to test whether some snake TE families  
158 might have been co-opted into brain gene regulatory networks. Focusing on highly  
159 expressed (RPKM>5) TEs' that are located within 5kb flanking regions of genes, we  
160 found that these nearby genes also show a significantly higher expression in brain than  
161 any other tissues ( $P$ -value<1.1e-40, Wilcoxon test, **Supplementary Figure 3**). The  
162 expression levels of individual genes are strongly correlated ( $P$ -value<1.35e-08,  
163 Spearman's test) with those of nearby TE's. These genes are predominantly enriched  
164 ( $Q$ -value < 0.05, Fisher's Chi-square test, **Supplementary Data 2**) in functional domains  
165 of 'biological process' compared to 'cellular component' and 'molecular function', and  
166 particularly enriched categories include environmental response ('response to organic  
167 substance', 'regulation of response to stimulus' and 'sensory perception of light stimulus')  
168 and brain signaling pathways ('neuropeptide signaling pathway', 'opioid receptor  
169 signaling pathway' and 'regulation of cell communication' etc.). Further experimental  
170 studies are required to elucidate how some of these TEs evolved to regulate the brain

171 gene expression; these results nevertheless highlighted the evolution dynamics and  
172 potential functional contribution of TEs in shaping the snake genome evolution.

173

#### 174 **Evolution of snake genes and gene families**

175 To pinpoint the critical genetic changes underlying the phenotypic innovations of snakes,  
176 we next mapped protein coding genes' gain and loss (**Figure 1B**), signatures of adaptive  
177 or degenerative evolution (**Figure 3A**) measured by their ratios ( $\omega$ ) of nonsynonymous vs.  
178 synonymous substitution rates (**Supplementary Data 3**) onto the phylogenetic tree. We  
179 inferred a total of 1,725 gene family expansion and 3,320 contraction events, and  
180 identified 610 genes that appear to have undergone positive selection (PSG) and 6149  
181 with relaxed selective constraints (RSG) at different branches, using a likelihood model  
182 and conserved lineage-specific test<sup>28</sup>. Genes of either scenario were separated for  
183 analyzing their enriched gene ontology (GO) and mouse orthologs' mutant phenotype  
184 (MP) terms, assuming most of them have a similar function in snakes.

185       Significantly ( $P$ -value<0.05, Fisher's exact test) enriched MP terms integrated with  
186 their branch information illuminated the molecular evolution history of snake-specific  
187 traits (**Figure 3A**). For example, as adaptations to a fossorial lifestyle, the four-legged  
188 snake ancestor<sup>29</sup> had evolved an extreme elongated body plan without limbs, and also  
189 fused eyelids ('spectacles', presumably for protecting eyes against soil<sup>30</sup>). The latter is  
190 supported by the results for the PSG genes *Ereg*, and RSGs *Cecr2* and *Ext1* at the snake  
191 ancestor branch (**Supplementary Data 4**), whose mouse mutant phenotype is shown as  
192 prematurely opened or absent eyelids. The limbless body plan has already driven many  
193 comparisons of expression domains and coding-sequences of the responsible *Hox* genes  
194 between snakes and other vertebrates<sup>7,17</sup>. We here refined the analyses to within-snake  
195 lineages, focusing on sequence evolution of *Hox* and other genes involved in limb  
196 development and somitogenesis. We annotated the nearly complete sequences of 39 *Hox*  
197 genes organized in four clusters (*HoxA-HoxD*) of the five-pacer viper. Compared to the  
198 green anole lizard, the four studied snake species have *Hox* genes whose sizes are  
199 generally reduced, due to the specific accumulation of DNA transposons in the lizard's  
200 introns and intergenic regions (**Supplementary Figure 4**). However, snakes have

201 accumulated particularly higher proportions of simple tandem repeat and short  
202 interspersed element (SINE) sequences within *Hox* clusters (**Supplementary Figure 5**),  
203 either as a result of relaxed selective constraints and/or evolution of novel regulatory  
204 elements. We identified 11 *Hox* genes as RSGs and one (*Hoxa9*) as PSG (**Figure 3B**).  
205 Their combined information of gene function and affected snake lineage informed the  
206 stepwise evolution of snake body plan. In particular, *Hoxa5*<sup>31</sup>, *Hoxa11*<sup>32</sup> and *Tbx5*<sup>33</sup>  
207 which specifically pattern the forelimbs in mouse, have been identified as RSGs in the  
208 common ancestor of all four snakes. While *Hoxc11* and *Tbx4*<sup>34</sup>, which pattern the  
209 hindlimbs in mouse, and many other limb-patterning genes (e.g. *Gli3*, *Tbx18*, *Alx4*) were  
210 identified as RSGs that evolved independently on snake external branches (**Figure 3B**,  
211 **Supplementary Data 4**). These results provide robust molecular evidence supporting the  
212 independent loss of hindlimbs after the complete loss of forelimbs in snake ancestors. In  
213 the snake ancestor branch, we also identified RSGs *Hoxa11*, *Hoxc10* and *Lfng*, which are  
214 respectively associated with sacral formation<sup>35</sup>, rib formation<sup>8</sup> and somitogenesis speed<sup>36</sup>  
215 in vertebrates. Their changed amino acids and the expression domains that have expanded  
216 in snakes relative to lizards<sup>17,19</sup> might have together contributed to the  
217 ‘de-regionalization’<sup>17</sup> and elongation of the snake body plan. In several external branches,  
218 we identified *Hoxd13* independently as RSG. Besides its critical roles in limb/digit  
219 patterning<sup>37</sup>, it is also associated with termination of somitogenesis signal and is  
220 specifically silenced at the snake tail relative to lizard<sup>7</sup>. This suggests that body  
221 elongation may have evolved more than once among snake lineages. Overall,  
222 limb/digit/tail development MP terms are significantly enriched in RSGs at both ancestral  
223 and external branches of snakes (**Figure 3A**), and we identified many such genes at  
224 different snake lineages for future targeted experimental studies (**Supplementary Table 9**,  
225 **Supplementary Data 4**).

226 Another important adaption to snakes’ ancestrally fossorial and later ground surface  
227 lifestyle is the shift of their dominant source of environmental sensing from  
228 visual/auditory to thermal/chemical cues. Unlike most other amniotes, extant snake  
229 species do not have external ears, and some basal species (e.g., blindsnake) have  
230 completely lost their eyes. Consistently, we found MP terms associated with hearing/ear



231 and vision/eye phenotypes (e.g., abnormal ear morphology, abnormal vision, abnormal  
232 cone electrophysiology) are enriched among RSGs along all major branches of snakes  
233 starting from their common ancestor (**Figure 3A, Supplementary Figure 6,**  
234 **Supplementary Data 4**). Gene families that have contracted in the ancestor of four  
235 studied snake species, and specifically in the viper, are also significantly ( $Q$ -value <  
236  $9.08e-4$ , Fisher's Exact Test) enriched in gene ontologies (GO) of 'sensory perception of  
237 light stimulus (GO:0050953)' or 'phototransduction (GO:0007602)' (**Figure 1C,**  
238 **Supplementary Data 5**). In particular, only three (*RHL*, *LWS* and *SWS1*) out of 13 opsin  
239 genes' complete sequences can be identified in the viper genome, consistent with the  
240 results found in python and cobra<sup>16</sup>. By contrast, infrared receptor gene *TRPA1*<sup>5</sup> and  
241 ubiquitous taste-signaling gene *TRPM5*<sup>38</sup> have respectively undergone adaptive evolution  
242 in five-pacer viper and the ancestor of boa and python. Gene families annotated with the  
243 GO term 'olfactory receptor (OR) activity' have a significant ( $Q$ -value <  $1.63e-4$ , Fisher's  
244 Exact Test) expansion in all snake species studied and at some of their ancestral nodes,  
245 except for the king cobra (**Supplementary Data 6**). In the boa and viper, whose genome  
246 sequences have much better quality than the other two snake genomes, we respectively  
247 annotated 369 and 412 putatively functional OR genes, based on homology search and  
248 the characteristic 7-TM (transmembrane) structure (**Materials and Methods**). Both  
249 terrestrial species have an OR repertoire predominantly comprised of class II OR families  
250 (OR1-14, presumably for binding airborne molecules, **Figure 3C**), and their numbers are  
251 much higher than the reported numbers in other Squamate genomes<sup>39</sup>. Some (ranging  
252 from 18 to 24) class I (OR51-56, for water-borne molecules) genes have also been found  
253 in the two species, indicating this OR class is not unique to python as previously  
254 suggested<sup>39</sup>. Compared with the green anole lizard, the boa and viper exhibit a significant  
255 ( $P < 0.05$ , Fisher's exact test) size expansion of OR family 5, 11 and 14, and also a bias  
256 towards being located on the Z chromosome (**Figure 3C**), leading to higher expression of  
257 many OR genes in males than in females (see below). In particular, OR5 in the viper  
258 probably has experienced additional expansion events and become the most abundant  
259 (with 71 members) family in the genome. Intriguingly, this family is specifically enriched  
260 in birds of prey<sup>40</sup> relative to other birds, and in non-frugivorous bats vs. frugivorous

261 bats<sup>41</sup>. Therefore, its expansion in the five-pacer viper could have been positively selected  
262 for a more efficient detection of prey.

263 Besides acute environmental sensing, specialized fangs<sup>6</sup> and venoms<sup>11</sup> (e.g,  
264 hemotoxins of viper or neurotoxins of elapid) arm the venomous snakes (~650 species) to  
265 immediately immobilize the much larger prey for prolonged ingestion, which probably  
266 comprised one of the most critical factors that had led to the advanced snakes' species  
267 radiation. It has been proposed that the tremendous venom diversity probably reflects  
268 snakes' local adaption for the prey<sup>42</sup> and was generated by changes in the expression of  
269 pre-existing or duplicated genes<sup>11,43</sup>. Indeed, we found that the five-pacer viper's venom  
270 gland gene repertoire has a very different composition comparing to other viper<sup>44</sup> or  
271 elapid species<sup>10</sup> (**Figure 3D**). We have annotated a total of 35 venom genes or gene  
272 families using all the known snake venom proteins as the query. Certain gene families,  
273 including snake venom metalloproteinases (SVMP), C-type lectin-like proteins (CLPs),  
274 thrombin-like snake venom serine proteinases (TL), Kunitz and disintegrins, have more  
275 genomic copies in the five-pacer viper than other studied snakes or the green anole lizard  
276 (**Supplementary Table 10**); while characteristic elapid venom genes like three-finger  
277 toxins (3FTx) are absent from the viper genome. Most venom proteins of both the viper  
278 and king cobra have expression restricted to venom or accessory glands, and for both  
279 species this is particularly seen for those genes that originated in the ancestor of snakes or  
280 of advanced snakes (**Figure 3D**). But for elapid or viper specific venom genes, i.e., those  
281 that originated more recently, they usually express in the liver of the other species. Such  
282 cases include FactorV, FactorX of king cobra and PLA2-2A of viper (**Figure 3D**). This  
283 suggests that these venom genes may have originated from metabolic proteins and  
284 undergone neo-/sub-functionalization, with altered expression.

285

### 286 **Evolution of snake sex chromosomes**

287 Different snake species exhibit a continuum of sex chromosome differentiation: pythons  
288 and boas possess homomorphic sex chromosomes, which is assumed to be the ancestral  
289 state; the lack of differentiation between the W and Z chromosomes suggests that most  
290 regions of this chromosome pair recombine like the autosomes<sup>45</sup>. Advanced snakes

291 usually have heteromorphic sex chromosomes that have undergone additional  
292 recombination suppressions<sup>45,46</sup>. We found the five-pacer viper probably has suppressed  
293 recombination throughout almost the entire sex chromosome pair, as the read coverage in  
294 the female that we sequenced is half that in the male (**Figure 1C, Figure 4**). By contrast,  
295 boa's homologous chromosomal regions show a read coverage pattern that does not differ  
296 from that of autosomes. Assuming that these two species share the same ancestral snake  
297 sex-determining region, this suggests that that region is not included in our current  
298 chromosomal assembly.

299 In plants, birds and mammals, it has been found that recombination suppression  
300 probably occurred by a succession of events. This has led to the punctuated accumulation  
301 of excessive neutral or deleterious mutations on the Y or W chromosome by genetic drift,  
302 and produced a gradient of sequence divergence levels over time, which are termed  
303 'evolutionary strata'<sup>47-49</sup>. Advanced snakes have been suggested to have at least two  
304 strata<sup>12</sup>. One goal of our much better genome assembly of the five-pacer viper compared  
305 to those of any other studied advanced snakes<sup>10,12</sup> (**Supplementary Table 4**) was to  
306 reconstruct a fine history of snake sex chromosome evolution. We assembled 77Mb  
307 Z-linked and 33Mb W-linked scaffolds (**Materials and Methods**). The reduction of  
308 female read coverage along the Z chromosome suggests there is a substantial divergence  
309 between Z- and W- linked sequences, and this would enable the assembly of two  
310 chromosomes' scaffolds in separate. Mapping the male reads confirmed that the inferred  
311 W-linked scaffold sequences are only present in female (**Supplementary Figure 7**).  
312 Their density and pairwise sequence divergence values within putative neutral regions  
313 along the Z chromosome indicate at least two 'evolution strata', with the older stratum  
314 extending 0~56Mb, and the younger one extending 56~70Mb. The boundary at 56Mb  
315 region can be also confirmed by analyses of repetitive elements on the Z chromosome  
316 (see below). Consistently, identifiable W-linked fragments are found at the highest  
317 density per megabase in the latter (**Figure 4**), suggesting that this region has suppressed  
318 recombination more recently. The older stratum includes much fewer identifiable  
319 fragments that can resolve the actual times of recombination suppression events. To study  
320 this region further, we inspected the homologous Z-linked region, whose recombination

321 has also been reduced, albeit to a much smaller degree than the W chromosome, after the  
322 complete suppression of recombination between Z/W in females. In addition, Z  
323 chromosome is biasedly transmitted in males. As males usually have a higher mutation  
324 rate than females, due to many more rounds of DNA replication during spermatogenesis  
325 than oogenesis ('male-driven evolution')<sup>50</sup>, Z-linked regions are expected to have a  
326 generally higher mutation rate than any other regions in the genome. This male-driven  
327 evolution effect has been demonstrated in other snake species<sup>12</sup>, and also been validated  
328 for the snakes inspected in this study (**Supplementary Figure 8**). As a result, we  
329 expected regions in older strata should be more diverged from their boa autosome-like  
330 homologs than those in the younger strata. This enabled us to identify another stratum  
331 (0~42Mb, stratum 2, S2 in **Figure 4**) and demarcate the oldest one (42~56Mb, S1), by  
332 estimating the sequence conservation level (measured by LASTZ alignment score, blue  
333 line) between the Z chromosomes of boa and viper. The Z-linked region in the inferred  
334 oldest stratum S1 exhibits the highest sequence divergence with the homologous  
335 W-linked region, and also the highest proportion of repetitive elements (CR1, Gypsy and  
336 L1 elements; **Figure 4** shows the example of Gypsy; other repeats are shown in  
337 **Supplementary Figure 9**). This can be explained by the effect of genetic drift<sup>51</sup>, which  
338 has been acting on the Z-linked S1 for the longest time since it reduced recombination  
339 rate in females. As a result, the accumulated repeats of S1 also tend to have a higher  
340 divergence level from the inferred ancestral consensus sequences compared to nearby  
341 strata (**Figure 4**). Unexpectedly, a similar enrichment was found in the homologous  
342 region of S1 in boa, despite being a recombining region and exhibiting the same coverage  
343 depth between sexes (**Figure 4, Supplementary Figure 9**). This indicates the pattern is  
344 partially contributed by the ancestral repeats that had already accumulated on the  
345 proto-sex chromosomes of snake species. Since our current viper sex chromosomal  
346 sequences used the green anole lizard chromosome 6 as a reference, rearrangements  
347 within this chromosome make it impossible to test whether S2 encompasses more than  
348 one stratum.

349 We dated the three resolved strata by constructing phylogenetic trees with  
350 homologous Z- and W- linked gene sequences of multiple snake species. Combining the

351 published CDS sequences of pygmy rattlesnake (Viperidae family species) and garter  
352 snake (Colubridae family species)<sup>12</sup>, we found 31 homologous Z-W gene pairs,  
353 representing the three strata. All of them clustered by chromosome (i.e., the Z-linked  
354 sequences from all the species cluster together, separately from the W-linked ones) rather  
355 than by species (**Supplementary Figure 10-12**). This indicates that all three strata  
356 formed before the divergence of advanced snakes, and after their divergence from boa  
357 and python, i.e., about 66.9 million years ago (**Figure 1C**).

358 We found robust evidence of functional degeneration on the W chromosome. It is  
359 more susceptible to the invasion of TEs: the assembled sequences' overall repeat content  
360 is at least 1.5 fold higher than that of the Z chromosome, especially in the LINE L1 (2.9  
361 fold) and LTR Gypsy families (4.3 fold) (**Supplementary Table 11 and Supplementary**  
362 **Figure 13**). Of 1,135 Z-linked genes, we were only able to identify 137 W-linked  
363 homologs. Among these, 62 (45.26%) have probably become pseudogenes due to  
364 nonsense mutations (**Supplementary Table 12**). W-linked loci generally transcribe at a  
365 significantly ( $P\text{-value} < 0.0005$ , Wilcoxon test) lower level, with pseudogenes transcribing  
366 even lower relative to the autosomal or Z-linked loci regardless of the tissue type  
367 (**Supplementary Figure 14-15**). Given such a chromosome-wide gene loss, like other  
368 snakes<sup>12</sup> or majority of species with ZW sex chromosomes<sup>52</sup>, the five-pacer viper shows a  
369 generally male-biased gene expression throughout the Z-chromosome and probably has  
370 not evolved global dosage compensation (**Supplementary Figure 16**).

371

## 372 **Discussion**

373 The 'snake-like' body plan has evolved repeatedly in other tetrapods (e.g., worm lizard  
374 and caecilians), in which limb reduction/loss seems to have always been accompanied by  
375 the body elongation. For example, several limb-patterning *Hox* genes (*Hoxc10*, *Hoxd13*)  
376 identified as RSG also have been characterized by previous work with a changed  
377 expression domain along the snake body axis<sup>7,17</sup>. Another RSG *Hoxa5* which is involved  
378 in the forelimb patterning<sup>31</sup>, also participates in lung morphogenesis<sup>53</sup>. It might have been  
379 involved in the elimination of one of the snake lungs during evolution. Therefore, the  
380 newly identified PSGs and RSGs throughout the snake phylogeny in this work

381 **(Supplementary Data 3-4, Supplementary Table 9)** can provide informative clues for  
382 future experimental work to use snake as an emerging ‘evo-devo’ model<sup>54</sup> to understand  
383 the genomic architecture of developmental regulatory network of organogenesis, or the  
384 crosstalk between these networks.

385 Like many of its other reptile relatives, the snake ancestor is very likely to determine  
386 the sex by temperature and does not have sex chromosomes. Extant species Boa can still  
387 undergo occasional parthenogenesis and is able to produce viable WW offspring<sup>55</sup>,  
388 consistent with its the most primitive vertebrate sex chromosome pair reported to date. In  
389 the ancestor of advanced snakes, we inferred that there were at least three recombination  
390 suppressions occurred between Z/W, leading to a generally degenerated W chromosome  
391 that we have observed in five-pacer viper. How snakes genetically determine the sex  
392 would be a rather intriguing question to study in future.

393

## 394 **Materials and Methods**

### 395 **Genome sequencing and assembly**

396 **All animal procedures were carried out with the approval of China National Genebank**  
397 **animal ethics committee**. We extracted genomic DNAs from blood of a male and a  
398 female five-pacer viper separately. A total of 13 libraries with insert sizes ranging from  
399 250bp to 40kb were constructed using female DNA, and 3 libraries with insert sizes from  
400 250 bp to 800 bp were constructed using male DNA. We performed paired-end  
401 sequencing (HiSeq 2000 platform) following manufacturer’s protocol, and produced 528  
402 Gb raw data (357 Gb for female and 171 Gb for male). We estimated the genome size  
403 based on the K-mer distribution. A K-mer refers to an artificial sequence division of K  
404 nucleotides iteratively from sequencing reads. The genome size can then be estimated  
405 through the equation  $G=K\_num/Peak\_depth$ , where the K\_num is the total number of  
406 K-mer, and Peak\_depth is the expected value of K-mer depth<sup>56</sup>. We found a single main  
407 peak in the male K-mer (K=17) frequency distribution and an additional minor peak in  
408 the female data, the latter of which probably results from the divergence between W and  
409 Z chromosomes **(Supplementary Figure 1)**. Based on the distribution, we estimated that  
410 the genome size of this species is about 1.43 Gb **(Supplementary Table 2)**, comparable

411 to that of other snakes (1.44 Gb and 1.66Gb for Burmese python and King cobra<sup>10,16</sup>,  
412 respectively).

413 After filtering out low-quality and duplicated reads, we performed additional filtering  
414 using the following criteria: we excluded the reads from short-insert libraries (250, 500,  
415 800 bp) with ‘N’s over 10% of the length or having more than 40 bases with the quality  
416 lower than 7, and the reads from large-insert libraries (2 kb to 40 kb) with ‘N’s over 20%  
417 of the length or having more than 30 bases with the quality lower than 7. Finally, 109.20  
418 Gb (73X coverage) male reads and 148.49Gb (99X coverage) female reads were retained  
419 for genome assembly (**Supplementary Table 1**) using SOAPdenovo<sup>57</sup>  
420 (<http://soap.genomics.org.cn>). To assemble the female and male genomes, reads from  
421 small-insert libraries of the female and male individual were used for contig construction  
422 separately. Then read-pairs from small- and large-insert libraries were utilized to join the  
423 contigs into scaffolds. We also used female long-insert libraries to join the male contigs  
424 into the longer scaffolds. At last, small-insert libraries of female and male individuals  
425 were used for gap closure for their respective genomes. The final assemblies of female  
426 and male have a scaffold N50 length of 2.0 Mb and 2.1 Mb respectively, and the gap  
427 content of the two genomes are both less than 6% (♀ 5.29%, ♂ 5.61%)(**Supplementary**  
428 **Table 4**).

429 To access the assembly quality, reads from small-insert libraries that passed our  
430 filtering criteria were aligned onto the two assemblies using BWA<sup>58</sup> (Version: 0.5.9-r16)  
431 allowing 8 mismatches and 1 indel per read. A total of ~97% reads can be mapped back  
432 to the draft genome (**Supplementary Table 3**), spanning 98% of the assembled regions  
433 excluding gaps (**Supplementary Table 13**), and most genomic bases were covered by  
434 about 80X reads (**Supplementary Figure 17**). Thus we conclude that we have assembled  
435 most part of the five-pacer viper genome. To further test for potential mis-joining of the  
436 contigs into scaffolds, we analyzed the paired-end information and found that 57% of the  
437 paired-end reads can be aligned uniquely with the expected orientation and distance. This  
438 proportion of the long insert library is significantly lower than that from the short insert  
439 libraries due to a circularization step during the library construction. When such  
440 paired-ends were excluded, the proportion increased to 94.98% (**Supplementary Table**

441 **3).** Overall, these tests suggested that the contigs and scaffolds are consistent with the  
442 extremely high density of paired-end reads, which in turn indicated the high-quality of  
443 the assembly.

444 Previous cytogenetic studies showed that snake genomes show extensive  
445 inter-chromosomal conservation with lizard<sup>27,45</sup>. Thus we used the chromosomal  
446 information from green anole lizard<sup>24</sup> as a proxy to assign the snake scaffolds. We first  
447 constructed their orthologous relationship combining information of synteny and  
448 reciprocal best BLAST hits (RBH). Then gene coordinates and strandedness from the  
449 consensus chromosome were used to place and orient the snake scaffolds. Furthermore,  
450 we linked scaffolds into chromosomes with 600 ‘N’s separating the adjacent scaffolds. In  
451 total, 625 five-pacer viper scaffolds comprising 832Mb (56.50% scaffolds in length) were  
452 anchored to 5 autosomes and Z chromosome (**Supplementary Table 6**).

453

#### 454 **Repeat and gene annotation**

455 We identified the repetitive elements in the genome combining both homology-based and  
456 *de novo* predictions. We utilized the ‘Tetrapoda’ repeat consensus library in Repbase<sup>59</sup> for  
457 RepeatMasker (<http://www.repeatmasker.org>) to annotate all the known repetitive  
458 elements in the five-pacer viper genome. In order to maximize the identification and  
459 classification of repeat elements, we further used RepeatModeler  
460 (<http://www.repeatmasker.org/RepeatModeler.html>) to construct the consensus repeat  
461 sequence libraries of the green anole lizard, boa and five-pacer viper, then used them as a  
462 query to identify repetitive elements using RepeatMasker. Finally, we retrieved a  
463 non-redundant annotation for each species after combining all the annotation results  
464 using libraries of ‘Tetrapoda’, ‘green anole lizard’, ‘boa’ and ‘five-pacer viper’. For the  
465 purpose of comparison, we ran the same pipeline and parameters in all the snake and  
466 lizard genomes as shown in **Supplementary Table 7**. To provide a baseline estimate for  
467 the sequence divergence of TEs from the snake ancestral status, we first merged the  
468 genomes from boa and five-pacer viper, and constructed the putative ancestral consensus



469 sequences using RepeatModeler. Then TE sequences of each snake species were aligned  
470 to the consensus sequence to estimate their divergence level using RepeatMasker.

471 For gene annotation, we combined resources of sequence homology, *de novo*  
472 prediction and transcriptome to build consensus gene models of the reference genome.  
473 Protein sequences of green lizard, chicken and human were aligned to the reference  
474 assembly using TBLASTN (E-value  $\leq 1E-5$ )<sup>60</sup>. Then the candidate gene regions were  
475 refined by GeneWise<sup>61</sup> for more accurate splicing sites and gene models. We randomly  
476 selected 1000 homology-based genes to train Augustus<sup>62</sup> for *de novo* prediction on the  
477 pre-masked genome sequences. We mapped RNA-seq reads of 13 samples to the genome  
478 using TopHat (v1.3.1)<sup>63</sup> and then assembled the transcripts by Cufflinks (v1.3.0)  
479 (<http://cufflinks.cbc.umd.edu/>). Transcripts from different samples were merged by  
480 Cuffmerge. Finally, gene models from these three methods were combined into a  
481 non-redundant gene set.

482 We finally obtained 21,194 protein-coding genes with intact open reading frames  
483 (ORFs) (**Supplementary Table 14**). The gene models (measured by gene length, mRNA  
484 length, exon number and exon length) are comparable to those of other vertebrates and  
485 are well supported by the RNA-Seq data (**Supplementary Figure 18 and**  
486 **Supplementary Table 5**). To annotate the gene names for each predicted protein-coding  
487 locus, we first mapped all the 21,194 genes to a manually collected Ensembl gene library,  
488 which consists of all proteins from *Anolis carolinensis*, *Gallus gallus*, *Homo sapiens*,  
489 *Xenopus tropicalis* and *Danio rerio*. Then the best hit of each snake gene was retained  
490 based on its BLAST alignment score, and the gene name of this best hit gene was  
491 assigned to the query snake gene. Most of the predicted genes can be found for their  
492 orthologous genes in the library at a threshold of 80% alignment rate (the aligned length  
493 divided by the original protein length), suggesting our annotation has a high quality  
494 (**Supplementary Table 15**).

495

#### 496 **RNA-seq and gene expression analyses**

497 Total RNAs were isolated from four types of tissues collected from both sexes, including  
498 brain, liver, venom gland and gonad (**Supplementary Table 16**). RNA sequencing

499 libraries were constructed using the Illumina mRNA-Seq Prep Kit. Briefly, oligo(dT)  
500 magnetic beads were used to purify poly-A containing mRNA molecules. The mRNAs  
501 were further fragmented and randomly primed during the first strand synthesis by reverse  
502 transcription. This procedure was followed by a second-strand synthesis with DNA  
503 polymerase I to create double-stranded cDNA fragments. The cDNAs were subjected to  
504 end-repairing by Klenow and T4 DNA polymerases and A-tailed by Klenow lacking  
505 exonuclease activity. The fragments were ligated to Illumina Paired-End Sequencing  
506 adapters, size selected by gel electrophoresis and then PCR amplified to complete the  
507 library preparation. The paired-end libraries were sequenced using Illumina HiSeq 2000  
508 (90/100 bp at each end).

509 We used TopHat (v1.3.1) for aligning the RNA-seq reads and predicting the splicing  
510 junctions with the following parameters: `-I/--max-intron-length: 10000, --segment-length:`  
511 `25, --library-type: fr-firststrand, --mate-std-dev 10, -r/--mate-inner-dist: 20`. Gene  
512 expression was measured by reads per kilobase of gene per million mapped reads  
513 (RPKM). To minimize the influence of different samples, RPKMs were adjusted by a  
514 scaling method based on TMM (trimmed mean of M values; M values mean the log  
515 expression ratios)<sup>64</sup> which assumes that the majority of genes are common to all samples  
516 and should not be differentially expressed.

517

## 518 **Evolution analyses**

519 A phylogenetic tree of the five-pacer viper and the other sequenced genomes (*Xenopus*  
520 *tropicalis*, *Homo sapiens*, *Mus musculus*, *Gallus gallus*, *Chelonia mydas*, *Alligator*  
521 *mississippiensis*, *Anolis carolinensis*, *Boa constrictor*, *Python bivittatus* and *Ophiophagus*  
522 *hannah*) was constructed using the 5,353 orthologous single-copy genes. Treebest  
523 (<http://treesoft.sourceforge.net/treebest.shtml>) was used to construct the phylogenetic tree.  
524 To estimate the divergence times between species, for each species, 4-fold degenerate  
525 sites were extracted from each orthologous family and concatenated to one sequence for  
526 each species. The MCMCtree program implemented in the Phylogenetic Analysis by  
527 Maximum Likelihood (PAML)<sup>65</sup> package was used to estimate the species divergence  
528 time. Calibration time was obtained from the TimeTree database

529 (<http://www.timetree.org/>). Three calibration points were applied in this study as normal  
530 priors to constrain the age of the nodes described below. 61.5-100.5 MA for the most  
531 recent common ancestor (TMRCAs) of human-mouse; 259.7-299.8 MA for TMRCAs of  
532 Crocodylidae and Lepidosauria; 235- 250.4 MA for TMRCAs of Aves and Crocodylidae<sup>66</sup>.

533 To examine the evolution of gene families in Squamate reptiles, genes from four  
534 snakes (*Boa constrictor*, *Python bivittatus*, *Deinagkistrodon acutus*, *Ophiophagus*  
535 *hannah*) and green anole lizard were clustered into gene families by Treefam  
536 (min\_weight=10, min\_density=0.34, and max\_size=500)<sup>67</sup>. The family expansion or  
537 contraction analysis was performed by CAFE<sup>68</sup>. In CAFE, a random birth-and-death  
538 model was proposed to study gene gain and loss in gene families across a user-specified  
539 phylogenetic tree. A global parameter  $\lambda$  (lambda), which described both gene birth ( $\lambda$ )  
540 and death ( $\mu = -\lambda$ ) rate across all branches in the tree for all gene families was estimated  
541 using maximum likelihood method. A conditional p-value was calculated for each gene  
542 family, and the families with conditional p-values lower than 0.05 were considered to  
543 have a significantly accelerated rate of expansion and contraction.

544 For the PAML analyses, we first assigned orthologous relationships for 12,657 gene  
545 groups among all Squamata and outgroup (turtle) using the reciprocal best blast hit  
546 algorithm and syntenic information. We used PRANK<sup>69</sup> to align the orthologous gene  
547 sequences, which takes phylogenetic information into account when placing a gap into  
548 the alignment. We filtered the PRANK alignments by gblocks<sup>70</sup> and excluded genes with  
549 high proportion of low complexity or repetitive sequences to avoid alignment errors. To  
550 identify the genes that evolve under positive selection (PSGs), we performed likelihood  
551 ratio test (LRT) using the branch model by PAML<sup>65</sup>. We first performed a LRT of the  
552 two-ratio model, which calculates the dN/dS ratio for the lineage of interest and the  
553 background lineage, against the one-ratio model assuming a uniform dN/dS ratio across all  
554 branches, so that to determine whether the focal lineage is evolving significantly faster  
555 (p-value < 0.05). In order to differentiate between episodes of positive selection and  
556 relaxation of purifying selection (RSGs), we performed a LRT of two-ratios model  
557 against the model that fixed the focal lineage's dN/dS ratio to be 1 (p-value < 0.05) and  
558 also required PSGs with the free-ratio model dN/dS > 1 at the focal lineage. For the

559 identified RSGs and PSGs, we used their mouse orthologs' mutant phenotype  
560 information<sup>71</sup> and performed enrichment analyses using MamPhEA<sup>72</sup>. Then we grouped  
561 the enriched MP terms by different tissue types.

562

### 563 **Olfactory receptor (OR), *Hox* and venom gene annotation**

564 To identify the nearly complete functional gene repertoire of OR, *Hox* and venom toxin  
565 genes in the investigated species, we first collected known amino acid sequences of 458  
566 intact OR genes from three species (green anole lizard, chicken and zebra finch)<sup>73</sup>, all  
567 annotated *Hox* genes from *Mus musculus* and *HoxC3* from *Xenopus tropicalis*, and  
568 obtained the query sequences of a total of 35 venom gene families<sup>74</sup> from UniProt  
569 (<http://www.uniprot.org/>) and NCBI (<http://www.ncbi.nlm.nih.gov/>). These 35 venom  
570 gene families represent the vast majority of known snake venoms. Then we performed a  
571 TblastN<sup>60</sup> search with the cutoff E-value of 1E-5 against the genomic data using these  
572 query sequences. Aligned sequence fragments were combined into one predicted gene  
573 using perl scripts if they belonged to the same query protein. Then each candidate gene  
574 region was extended for 2kb from both ends to predict its open reading frame by  
575 GeneWise<sup>61</sup>. Obtained sequences were verified as corresponding genes by BlastP  
576 searches against NCBI nonredundant (nr) database. Redundant annotations within  
577 overlapped genomic regions were removed.

578 For the OR gene prediction, these candidates were classified into functional genes  
579 and nonfunctional pseudogenes. If a sequence contained any disruptive frame-shift  
580 mutations and/or premature stop codons, it was annotated as a pseudogene. The  
581 remaining genes were examined using TMHMM2.0<sup>75</sup>. Those OR genes containing more  
582 at least 6 transmembrane (TM) structures were considered as intact candidates and the  
583 rest were also considered as pseudogenes. Finally, each OR sequence identified was  
584 searched against the HORDE (the Human Olfactory Data Explorer) database  
585 (<http://genome.weizmann.ac.il/horde/>) using the FASTA (<ftp://ftp.virginia.edu/pub/fast>)  
586 and classified into the different families according to their best-aligned human OR  
587 sequence. For the venom toxin genes, we only kept these genes with RPKM higher than 1  
588 in the five-pacer viper and king cobra venom gland tissue as final toxin gene set.

589

## 590 **Identification and analyses of sex-linked genes**

591 To identify the Z-linked scaffolds in the male assembly, we aligned the female and male  
592 reads to the male genome separately with BWA<sup>58</sup> allowing 2 mismatches and 1 indel.  
593 Scaffolds with less than 80% alignment coverage (excluding gaps) or shorter than 500 bp  
594 in length were excluded. Then single-base depths were calculated using SAMtools<sup>76</sup>, with  
595 which we calculated the coverage and mean depth for each scaffold. The expected male  
596 vs. female (M:F) scaled ratio of a Z-linked scaffold is equal to 2, and we defined a  
597 Z-linked scaffold with the variation of an observed scaled ratio to be less than 20% (i.e.  
598 1.6 to 2.4). With this criteria, we identified 139 Z-linked scaffolds, representing 76.93Mb  
599 with a scaffold N50 of 962 kb (**Supplementary Table 17**). These Z-linked scaffolds were  
600 organized into pseudo-chromosome sequence based on their homology with green anole  
601 lizard. Another characteristic pattern of the Z-linked scaffolds is that there should be  
602 more heterozygous SNPs in the male individual than in the female individual resulted  
603 from their hemizygous state in female. We used SAMtools<sup>76</sup> for SNP/indel calling. SNPs  
604 and indels whose read depths were too low (<10) or too high (>120), or qualities lower  
605 than 100 were excluded. As expected, the frequency of heterozygous sites of Z  
606 chromosome of the female individual is much lower than that of the male individual  
607 (0.005% vs 0.08%), while the heterozygous rate of autosomes are similar in both sex  
608 (~0.1%) (**Supplementary Table 18**). To identify the W-linked scaffolds, we used the  
609 similar strategy as the Z-linked scaffold detection to obtain the coverage and mean depth  
610 of each scaffold. Then we identified those scaffolds covered by female reads over 80% of  
611 the length, and by male reads with less than 20% of the length. With this method, we  
612 identified 33 Mb W-linked scaffolds with a scaffold N50 of 48 kb (**Supplementary Table**  
613 **19**).

614 We used the protein sequences of Z/W gametologs from garter snake and pygmy  
615 rattle snake<sup>12</sup> as queries and aligned them to the genomes of boa (the SGA assembly,  
616 <http://gigadb.org/dataset/100060>), five-pacer viper and king cobra with BLAST<sup>60</sup>. The  
617 best aligned (cutoff: identity>=70%, coverage>=50%) region with extended flanking  
618 sequences of 5kb at both ends was then used to determine whether it contains an intact

619 open reading frame (ORF) by GeneWise<sup>61</sup> (-tfor -genesf -gff -sum). We annotated the  
620 ORF as disrupted when GeneWise reported at least one premature stop codon or  
621 frame-shift mutation. CDS sequences of single-copy genes' Z/W gametologs were  
622 aligned by MUSCLE<sup>77</sup> and the resulting alignments were cleaned by gblocks<sup>70</sup> (-b4=5,  
623 -t=c, -e=-gb). Only alignments longer than 300bp were used for constructing maximum  
624 likelihood trees by RAxML<sup>78</sup> to infer whether their residing evolutionary stratum is  
625 shared among species or specific to lineages.

626

## 627 **References**

- 628 1 Greene, H. W. *Snakes: the evolution of mystery in nature*. (Univ of California  
629 Press, 1997).
- 630 2 Tchernov, E., Rieppel, O., Zaher, H., Polcyn, M. J. & Jacobs, L. L. A fossil snake  
631 with limbs. *Science* **287**, 2010-2012 (2000).
- 632 3 Cohn, M. J. & Tickle, C. Developmental basis of limblessness and axial  
633 patterning in snakes. *Nature* **399**, 474-479, doi:10.1038/20944 (1999).
- 634 4 Apesteguia, S. & Zaher, H. A Cretaceous terrestrial snake with robust hindlimbs  
635 and a sacrum. *Nature* **440**, 1037-1040, doi:10.1038/nature04413 (2006).
- 636 5 Gracheva, E. O. *et al.* Molecular basis of infrared detection by snakes. *Nature* **464**,  
637 1006-1011, doi:10.1038/nature08943 (2010).
- 638 6 Vonk, F. J. *et al.* Evolutionary origin and development of snake fangs. *Nature* **454**,  
639 630-633, doi:10.1038/nature07178 (2008).
- 640 7 Di-Poi, N. *et al.* Changes in Hox genes' structure and function during the  
641 evolution of the squamate body plan. *Nature* **464**, 99-103,  
642 doi:10.1038/nature08789 (2010).
- 643 8 Guerreiro, I. *et al.* Role of a polymorphism in a Hox/Pax-responsive enhancer in  
644 the evolution of the vertebrate spine. *Proc Natl Acad Sci U S A* **110**, 10682-10686,  
645 doi:10.1073/pnas.1300592110 (2013).
- 646 9 Fry, B. G. From genome to "venome": molecular origin and evolution of the  
647 snake venom proteome inferred from phylogenetic analysis of toxin sequences  
648 and related body proteins. *Genome Res* **15**, 403-420, doi:10.1101/gr.3228405

- 649 (2005).
- 650 10 Vonk, F. J. *et al.* The king cobra genome reveals dynamic gene evolution and  
651 adaptation in the snake venom system. *Proc Natl Acad Sci U S A* **110**,  
652 20651-20656, doi:10.1073/pnas.1314702110 (2013).
- 653 11 Fry, B. G., Vidal, N., van der Weerd, L., Kochva, E. & Renjifo, C. Evolution and  
654 diversification of the Toxicofera reptile venom system. *J Proteomics* **72**, 127-136,  
655 doi:10.1016/j.jprot.2009.01.009 (2009).
- 656 12 Vicoso, B., Emerson, J. J., Zektser, Y., Mahajan, S. & Bachtrog, D. Comparative  
657 sex chromosome genomics in snakes: differentiation, evolutionary strata, and lack  
658 of global dosage compensation. *PLoS Biol* **11**, e1001643,  
659 doi:10.1371/journal.pbio.1001643 (2013).
- 660 13 Ohno, S. *Sex Chromosomes and Sex-linked Genes*. Vol. 1967 (Springer Berlin  
661 Heidelberg, 1967).
- 662 14 Kaiser, V. B. & Bachtrog, D. Evolution of sex chromosomes in insects. *Annu Rev*  
663 *Genet* **44**, 91-112, doi:10.1146/annurev-genet-102209-163600 (2010).
- 664 15 Westergaard, M. The mechanism of sex determination in dioecious flowering  
665 plants. *Adv Genet* **9**, 217-281 (1958).
- 666 16 Castoe, T. A. *et al.* The Burmese python genome reveals the molecular basis for  
667 extreme adaptation in snakes. *Proc Natl Acad Sci U S A* **110**, 20645-20650,  
668 doi:10.1073/pnas.1314475110 (2013).
- 669 17 Woltering, J. M. *et al.* Axial patterning in snakes and caecilians: evidence for an  
670 alternative interpretation of the Hox code. *Dev Biol* **332**, 82-89,  
671 doi:10.1016/j.ydbio.2009.04.031 (2009).
- 672 18 Head, J. J. & Polly, P. D. Evolution of the snake body form reveals homoplasmy in  
673 amniote Hox gene function. *Nature* **520**, 86-89, doi:10.1038/nature14042 (2015).
- 674 19 Gomez, C. *et al.* Control of segment number in vertebrate embryos. *Nature* **454**,  
675 335-339, doi:10.1038/nature07020 (2008).
- 676 20 Zhang, B. *et al.* Transcriptome analysis of *Deinagkistrodon acutus* venomous  
677 gland focusing on cellular structure and functional aspects using expressed  
678 sequence tags. *BMC Genomics* **7** (2006).

- 679 21 Bradnam, K. R. *et al.* Assemblathon 2: evaluating de novo methods of genome  
680 assembly in three vertebrate species. *Gigascience* **2**, 10,  
681 doi:10.1186/2047-217X-2-10 (2013).
- 682 22 Lin, X. *et al.* The effect of the fibrinolytic enzyme FIIa from *Agkistrodon acutus*  
683 venom on acute pulmonary thromboembolism. *Acta Pharmacologica Sinica* **32**,  
684 239-244 (2011).
- 685 23 Li, Z. *et al.* Comparison of the two major classes of assembly algorithms:  
686 overlap-layout-consensus and de-bruijn-graph. *Brief Funct Genomics* **11**, 25-37,  
687 doi:10.1093/bfgp/elr035 (2012).
- 688 24 Alfoldi, J. *et al.* The genome of the green anole lizard and a comparative analysis  
689 with birds and mammals. *Nature* **477**, 587-591, doi:10.1038/nature10390 (2011).
- 690 25 Pyron, R. A. & Burbrink, F. T. Extinction, ecological opportunity, and the origins  
691 of global snake diversity. *Evolution* **66**, 163-178,  
692 doi:10.1111/j.1558-5646.2011.01437.x (2012).
- 693 26 Yunfang, Q., Xingfu, X., Youjin, Y., Fuming, D. & Meihua., H. Chromosomal  
694 studies on six species of venomous snakes in Zhejiang. *Acta Zoologica Sinica* **273**,  
695 218-227 (1981).
- 696 27 Srikulnath, K. *et al.* Karyotypic evolution in squamate reptiles: comparative gene  
697 mapping revealed highly conserved linkage homology between the butterfly  
698 lizard (*Leiolepis reevesii rubritaeniata*, Agamidae, Lacertilia) and the Japanese  
699 four-striped rat snake (*Elaphe quadrivirgata*, Colubridae, Serpentes). *Chromosome*  
700 *Res* **17**, 975-986, doi:10.1007/s10577-009-9101-7 (2009).
- 701 28 Yang, Z. Likelihood ratio tests for detecting positive selection and application to  
702 primate lysozyme evolution. *Mol Biol Evol* **15**, 568-573 (1998).
- 703 29 Martill, D. M., Tischlinger, H. & Longrich, N. R. EVOLUTION. A four-legged  
704 snake from the Early Cretaceous of Gondwana. *Science* **349**, 416-419,  
705 doi:10.1126/science.aaa9208 (2015).
- 706 30 Held, J. *How the Snake Lost Its Legs: Curious Tales from the Frontier of*  
707 *Evo-Devo.* (Cambridge University Press, 2014).
- 708 31 Xu, B. *et al.* Hox5 interacts with Plzf to restrict Shh expression in the developing



- 709 forelimb. *Proc Natl Acad Sci U S A* **110**, 19438-19443,  
710 doi:10.1073/pnas.1315075110 (2013).
- 711 32 Boulet, A. M. & Capecchi, M. R. Multiple roles of Hoxa11 and Hoxd11 in the  
712 formation of the mammalian forelimb zeugopod. *Development* **131**, 299-309,  
713 doi:10.1242/dev.00936 (2004).
- 714 33 King, M., Arnold, J. S., Shanske, A. & Morrow, B. E. T-genes and limb bud  
715 development. *Am J Med Genet A* **140**, 1407-1413, doi:10.1002/ajmg.a.31250  
716 (2006).
- 717 34 Logan, M. & Tabin, C. J. Role of Pitx1 upstream of Tbx4 in specification of  
718 hindlimb identity. *Science* **283**, 1736-1739 (1999).
- 719 35 Wellik, D. M. & Capecchi, M. R. Hox10 and Hox11 genes are required to  
720 globally pattern the mammalian skeleton. *Science* **301**, 363-367,  
721 doi:10.1126/science.1085672 (2003).
- 722 36 McGrew, M. J., Dale, J. K., Fraboulet, S. & Pourquie, O. The lunatic fringe gene  
723 is a target of the molecular clock linked to somite segmentation in avian embryos.  
724 *Curr Biol* **8**, 979-982 (1998).
- 725 37 Muragaki, Y., Mundlos, S., Upton, J. & Olsen, B. R. Altered growth and  
726 branching patterns in synpolydactyly caused by mutations in HOXD13. *Science*  
727 **272**, 548-551 (1996).
- 728 38 Kaske, S. *et al.* TRPM5, a taste-signaling transient receptor potential ion-channel,  
729 is a ubiquitous signaling component in chemosensory cells. *BMC Neuroscience* **8**,  
730 49 (2007).
- 731 39 Dehara, Y. *et al.* Characterization of squamate olfactory receptor genes and their  
732 transcripts by the high-throughput sequencing approach. *Genome Biol Evol* **4**,  
733 602-616, doi:10.1093/gbe/evs041 (2012).
- 734 40 Khan, I. *et al.* Olfactory receptor subgenomes linked with broad ecological  
735 adaptations in Sauropsida. *Mol Biol Evol* **32**, 2832-2843,  
736 doi:10.1093/molbev/msv155 (2015).
- 737 41 Hayden, S. *et al.* A cluster of olfactory receptor genes linked to frugivory in bats.  
738 *Mol Biol Evol* **31**, 917-927, doi:10.1093/molbev/msu043 (2014).

- 739 42 Daltry, J. C., Wuster, W. & Thorpe, R. S. Diet and snake venom evolution. *Nature*  
740 **379**, 537-540, doi:10.1038/379537a0 (1996).
- 741 43 Hargreaves, A. D., Swain, M. T., Hegarty, M. J., Logan, D. W. & Mulley, J. F.  
742 Restriction and recruitment-gene duplication and the origin and evolution of  
743 snake venom toxins. *Genome Biol Evol* **6**, 2088-2095, doi:10.1093/gbe/evu166  
744 (2014).
- 745 44 Casewell, N. R., Harrison, R. A., Wuster, W. & Wagstaff, S. C. Comparative  
746 venom gland transcriptome surveys of the saw-scaled vipers (Viperidae: Echis)  
747 reveal substantial intra-family gene diversity and novel venom transcripts. *BMC*  
748 *Genomics* **10**, 564, doi:10.1186/1471-2164-10-564 (2009).
- 749 45 Matsubara, K. *et al.* Evidence for different origin of sex chromosomes in snakes,  
750 birds, and mammals and step-wise differentiation of snake sex chromosomes.  
751 *Proc Natl Acad Sci U S A* **103**, 18190-18195, doi:10.1073/pnas.0605274103  
752 (2006).
- 753 46 Ohno, S. *Sex chromosomes and sex-linked genes*. Vol. 1 (Springer, 1967).
- 754 47 Zhou, Q. *et al.* Complex evolutionary trajectories of sex chromosomes across bird  
755 taxa. *Science* **346**, 1246338, doi:10.1126/science.1246338 (2014).
- 756 48 Cortez, D. *et al.* Origins and functional evolution of Y chromosomes across  
757 mammals. *Nature* **508**, 488-493, doi:10.1038/nature13151 (2014).
- 758 49 Nicolas, M. *et al.* A gradual process of recombination restriction in the  
759 evolutionary history of the sex chromosomes in dioecious plants. *PLoS Biol* **3**, e4,  
760 doi:10.1371/journal.pbio.0030004 (2005).
- 761 50 Li, W. H., Yi, S. & Makova, K. Male-driven evolution. *Curr Opin Genet Dev* **12**,  
762 650-656 (2002).
- 763 51 Vicoso, B. & Charlesworth, B. Evolution on the X chromosome: unusual patterns  
764 and processes. *Nat Rev Genet* **7**, 645-653, doi:10.1038/nrg1914 (2006).
- 765 52 Mank, J. E. The W, X, Y and Z of sex-chromosome dosage compensation. *Trends*  
766 *Genet* **25**, 226-233, doi:10.1016/j.tig.2009.03.005 (2009).
- 767 53 Boucherat, O. *et al.* Partial functional redundancy between Hoxa5 and Hoxb5  
768 paralog genes during lung morphogenesis. *Am J Physiol Lung Cell Mol Physiol*

- 769           **304**, L817-L830 (2013).
- 770    54    Guerreiro, I. & Duboule, D. Snakes: hatching of a model system for Evo-Devo?  
771           *Int J Dev Biol* **58**, 727-732, doi:10.1387/ijdb.150026dd (2014).
- 772    55    Booth, W., Johnson, D. H., Moore, S., Schal, C. & Vargo, E. L. Evidence for  
773           viable, non-clonal but fatherless Boa constrictors. *Biol Lett* **7**, 253-256,  
774           doi:10.1098/rsbl.2010.0793 (2011).
- 775    56    Li, R. *et al.* The sequence and de novo assembly of the giant panda genome.  
776           *Nature* **463**, 311-317, doi:10.1038/nature08696 (2010).
- 777    57    Luo, R. *et al.* SOAPdenovo2: an empirically improved memory-efficient  
778           short-read de novo assembler. *Gigascience* **1**, 18, doi:10.1186/2047-217X-1-18  
779           (2012).
- 780    58    Li, H. & Durbin, R. Fast and accurate short read alignment with Burrows-Wheeler  
781           transform. *Bioinformatics* **25**, 1754-1760, doi:10.1093/bioinformatics/btp324  
782           (2009).
- 783    59    Jurka, J. Repbase update: a database and an electronic journal of repetitive  
784           elements. *Trends Genet* **16**, 418-420 (2000).
- 785    60    Altschul, S. F., Gish, W., Miller, W., Myers, E. W. & Lipman, D. J. Basic local  
786           alignment search tool. *J Mol Biol* **215**, 403-410,  
787           doi:10.1016/S0022-2836(05)80360-2 (1990).
- 788    61    Birney, E., Clamp, M. & Durbin, R. GeneWise and Genomewise. *Genome Res* **14**,  
789           988-995, doi:10.1101/gr.1865504 (2004).
- 790    62    Stanke, M., Steinkamp, R., Waack, S. & Morgenstern, B. AUGUSTUS: a web  
791           server for gene finding in eukaryotes. *Nucleic Acids Res* **32**, W309-312,  
792           doi:10.1093/nar/gkh379 (2004).
- 793    63    Trapnell, C., Pachter, L. & Salzberg, S. L. TopHat: discovering splice junctions  
794           with RNA-Seq. *Bioinformatics* **25**, 1105-1111, doi:10.1093/bioinformatics/btp120  
795           (2009).
- 796    64    Robinson, M. D. & Oshlack, A. A scaling normalization method for differential  
797           expression analysis of RNA-seq data. *Genome Biol* **11**, R25,  
798           doi:10.1186/gb-2010-11-3-r25 (2010).

- 799 65 Yang, Z. PAML 4: phylogenetic analysis by maximum likelihood. *Mol Biol Evol*  
800 **24**, 1586-1591, doi:10.1093/molbev/msm088 (2007).
- 801 66 Benton, M. J. & Donoghue, P. C. Paleontological evidence to date the tree of life.  
802 *Mol Biol Evol* **24**, 26-53, doi:10.1093/molbev/msl150 (2007).
- 803 67 Li, H. *et al.* TreeFam: a curated database of phylogenetic trees of animal gene  
804 families. *Nucleic Acids Res* **34**, D572-580, doi:10.1093/nar/gkj118 (2006).
- 805 68 De Bie, T., Cristianini, N., Demuth, J. P. & Hahn, M. W. CAFE: a computational  
806 tool for the study of gene family evolution. *Bioinformatics* **22**, 1269-1271,  
807 doi:10.1093/bioinformatics/btl097 (2006).
- 808 69 Loytynoja, A. & Goldman, N. An algorithm for progressive multiple alignment of  
809 sequences with insertions. *Proc Natl Acad Sci U S A* **102**, 10557-10562,  
810 doi:10.1073/pnas.0409137102 (2005).
- 811 70 Talavera, G. & Castresana, J. Improvement of phylogenies after removing  
812 divergent and ambiguously aligned blocks from protein sequence alignments. *Syst*  
813 *Biol* **56**, 564-577, doi:10.1080/10635150701472164 (2007).
- 814 71 Bult, C. J. *et al.* Mouse genome database 2016. *Nucleic Acids Res* **44**, D840-847,  
815 doi:10.1093/nar/gkv1211 (2016).
- 816 72 Weng, M. P. & Liao, B. Y. MamPhEA: a web tool for mammalian phenotype  
817 enrichment analysis. *Bioinformatics* **26**, 2212-2213,  
818 doi:10.1093/bioinformatics/btq359 (2010).
- 819 73 Steiger, S. S., Kuryshev, V. Y., Stensmyr, M. C., Kempnaers, B. & Mueller, J. C.  
820 A comparison of reptilian and avian olfactory receptor gene repertoires:  
821 species-specific expansion of group gamma genes in birds. *BMC Genomics* **10**,  
822 446, doi:10.1186/1471-2164-10-446 (2009).
- 823 74 Mackessy, S. P. *Handbook of venoms and toxins of reptiles*. (CRC Press, 2016).
- 824 75 Krogh, A., Larsson, B., von Heijne, G. & Sonnhammer, E. L. Predicting  
825 transmembrane protein topology with a hidden Markov model: application to  
826 complete genomes. *J Mol Biol* **305**, 567-580, doi:10.1006/jmbi.2000.4315 (2001).
- 827 76 Li, H. *et al.* The Sequence Alignment/Map format and SAMtools. *Bioinformatics*  
828 **25**, 2078-2079, doi:10.1093/bioinformatics/btp352 (2009).

829 77 Edgar, R. C. MUSCLE: multiple sequence alignment with high accuracy and high  
830 throughput. *Nucleic Acids Res* **32**, 1792-1797, doi:10.1093/nar/gkh340 (2004).  
831 78 Stamatakis, A. RAxML version 8: a tool for phylogenetic analysis and  
832 post-analysis of large phylogenies. *Bioinformatics* **30**, 1312-1313,  
833 doi:10.1093/bioinformatics/btu033 (2014).  
834

835 **Figure Legend**

836 **Figure 1.** The comparative genomic landscape of five-pacer viper

837 (A) *Deinagkistrodon acutus* (five-pacer viper) and eight adult tissues used in this study.

838 (B) Circos plot showing the linkage group assignment using lizard chromosomes as

839 reference (outmost circle), normalized female vs. male mapped read coverage ratio (blue

840 line) and GC-isochore structures of five-pacer viper (red), boa (yellow) and green anole

841 lizard (green). Both snake genomes have a much higher variation of local GC content

842 than that of green anole lizard. (C) Phylogenomic tree constructed using fourfold

843 degenerate sites from 8006 single-copy orthologous genes. We also showed bootstrapping

844 percentages, the numbers of inferred gene family expansion (in green) and contraction

845 (red), and corresponding phylogenetic terms at each node. MRCA: most recent common

846 ancestor.

847

848 **Figure 2.** Genomic and transcriptomic variation of snake transposable elements

849 (A) Violin plots showing each type of TE's frequency distribution of sequence divergence

850 level from the inferred ancestral consensus sequences. Clustering of TEs with similar

851 divergence levels, manifested as the 'bout' of the violin, corresponds to the burst of TE

852 amplification. (B) Bar plots comparing the genome-wide TE content between four snake

853 species. TE families were annotated combining information of sequence homology and

854 *de novo* prediction. (C) TE's average normalized expression level (measured by RPKM)

855 across different tissues in five-pacer viper.

856

857 **Figure 3.** Evolution of snake genes and gene families

858 (A) Phylogenetic distribution of mutant phenotypes (MP) of mouse orthologs of snakes.

859 Each MP term is shown by an organ icon, and significantly enriched for snake genes

860 undergoing positive selection (red) or relaxed selective constraints (gray) inferred by

861 lineage-specific PAML analyses. (B) We show the four *Hox* gene clusters of snakes,

862 with each box showing the ratio of nonsynonymous (dN) over synonymous substitution

863 (dS) rate at the snake ancestor lineage. White boxes represent genes that haven't been

864 calculated for their ratios due to the genome assembly issue in species other than

865 five-pacer viper. Boxes with dotted line refer to genes with dS approaching 0, therefore  
866 the dN/dS ratio cannot be directly shown. Each cluster contains up to 13 *Hox* genes with  
867 some of them lost during evolution. We also marked certain *Hox* genes undergoing  
868 positive selection (in red) or relaxed selective constraints (in green) at a specific lineage  
869 above the box. Each lineage was denoted as: S: *Serpentes* (ancestor of all snakes), H:  
870 *Henophidia* (ancestor of boa and python), B: *Boa constrictor*, P: *Python bivittatus*, C:  
871 *Colubroidea*, D: *Deinagkistrodon acutus*, O: *Ophiophagus hannah*. (C) Comparing  
872 olfactory receptor (OR) gene repertoire between boa, viper and lizard. Each cell  
873 corresponds to a certain OR family (shown at y-axis) gene number on a certain  
874 chromosome (x-axis). (D) Pie chart shows the composition of normalized venom gland  
875 transcripts of male five-pacer viper. The heatmap shows the normalized expression level  
876 (in RPKM) across different tissues of viper and king cobra. We grouped the venom genes  
877 by their time of origination, shown at the bottom x-axis.

878

879 **Figure 4.** Snake sex chromosomes have at least three evolution strata

880 The three tracks in the top panel shows female read depths along the Z chromosome  
881 relative to the median depth value of autosomes, Z/W pairwise sequence divergence  
882 within intergenic regions, and female read depths of W-linked sequence fragments  
883 relative to the median depth value of autosomes. Depths close to 1 suggest that the region  
884 is a recombining pseudoautosomal region (PAR), whereas depths of 0.5 are expected in a  
885 highly differentiated fully sex-linked region where females are hemizygous. The  
886 identifiable W-linked fragments are much denser at the region 56Mb~70Mb, probably  
887 because this region (denoted as stratum 3, S3) has suppressed recombination most  
888 recently. S2 and S1 were identified and demarcated by characterizing the sequence  
889 conservation level (measured by LASTZ alignment score, blue line) between the chrZs of  
890 boa and viper. At the oldest stratum S1 where recombination has been suppressed for the  
891 longest time, there is an enrichment of repetitive elements on the affected Z-linked region  
892 (Gypsy track in red, 100kb non-overlapping sliding window). And these Z-linked TEs A  
893 similar pattern was found in homologous recombining region of boa, but not in lizard.

894

895 **Supplementary Figure Legend**

896 **Supplementary Figure 1.** K-mer estimation of the genome size of five-pacer viper.

897 Distribution of 17-mer frequency in the used sequencing reads from female (left) and  
898 male (right) samples. The x-axis represents the sequencing depth. The Y-axis represents  
899 the proportion of a *K*-mer counts in total *K*-mer counts at a given sequencing depth. The  
900 estimated genome size is about 1.43 Gb.

901

902 **Supplementary Figure 2.** GC isochore structure of different tetrapod genomes.

903 We show the standard deviation (SD) of GC content calculated with different window  
904 size (3 kb to 320 kb) for different vertebrate genomes.

905

906 **Supplementary Figure 3.** Comparing expression levels of genes nearby expressed TEs  
907 in each tissue.

908 We show expression patterns of genes around highly expressed TE (RPKM > 5) in  
909 different tissues from both sexes, including brain, liver, venom gland and gonad. We also  
910 performed comparison between the focal tissue vs. the other tissues. We show levels of  
911 significance with asterisks. \*: 0.001= $\leq$  *P*-value <0.01; \*\*: 0.0001= $\leq$  *P*<0.001; \*\*\*:  
912 *P*<0.0001.

913

914 **Supplementary Figure 4.** Comparison of *Hox* gene structure between snakes and lizard.

915 Schematic representation of four *Hox* clusters in anole lizard, boa, Burmese python,  
916 five-pacer viper and king cobra. Each number from 1 to 13 denotes the specific *Hox* gene  
917 belonging to one cluster. We showed the length difference between each species vs.  
918 mouse by the colored lines (for intergenic regions) or boxes (for intronic regions): a  
919 1.5~3 fold increase of length was shown by blue, a more than 3-fold increase was shown  
920 in red. Exons were shown by vertical lines, and dotted lines refer to exons with unknown  
921 boundaries, either due to assembly issues. Double-slashes refer to the gap between two  
922 different scaffolds.

923

924 **Supplementary Figure 5.** Repeat accumulation at *Hox* gene clusters.



925 Comparison of the TE and simple repeat content of *Hox* cluster genes with 5kb flanking  
926 regions between snakes and lizard. We calculated the repeat density by dividing the total  
927 length of specific repeat sequence vs. the length of corresponding region. This density was  
928 normalized over the genome-wide repeat density and then shown by heatmap.

929

930 **Supplementary Figure 6.** Phylogenetic distribution of enriched MP terms.

931 We identified enriched mutant phenotypes (MP) of mouse orthologs of snake genes that  
932 are undergoing lineage-specific positive selection (red) and relaxed selective constraints  
933 (gray). And then we mapped these MP terms onto the snake phylogeny.

934

935 **Supplementary Figure 7.** Read coverage density plot of different linkage groups.

936 For each linkage group (from left to right, chrW, chrZ, chr1), male reads were plotted in  
937 blue, and female reads in red. The identified chrW scaffolds in this work all show a  
938 female-specific read depth pattern.

939

940 **Supplementary Figure 8.** Male-driven evolution effect in snakes.

941 For each gene, we calculated the substitution rates between anole lizard and each of boa,  
942 Burmese python, five-pacer viper and king cobra at synonymous sites (dS) and  
943 non-synonymous sites (dN) divided into different chromosome sets. To detect  
944 branch-specific differences, we obtained for each gene the ratios of these evolutionary  
945 rates between the different snake species vs. boa. Since boa's homologous chromosomal  
946 region to the Z chromosomes of other advanced snakes represent the ancestral status of  
947 snake sex chromosomes, a higher relative ratios of Z-linked dS of advanced snakes vs.  
948 boa than those of autosomes indicate the male-driven evolution effect. We shown the  
949 Wilcoxon test significant differences between the Z chromosome and the autosomes  
950 (chr1-5) are marked with asterisks (\*\*\*,  $P$ -value < 0.001).

951

952 **Supplementary Figure 9.** Repeat accumulation along the snake sex chromosomes.

953 Shown are comparisons of the distribution of Gypsy, CR1 and L1 content along the  
954 chromosome in anole lizard, Boa and five-pacer viper. The TE content was calculated by

955 averaging the TE density of each sliding window of 100kb as well as the flanking 10  
956 windows.

957

958 **Supplementary Figure 10.** Gene trees for Z and W linked gametologs in S1 region.  
959 Shown are maximum likelihood (ML) trees using coding regions of Z and W allelic  
960 sequences from multiple snake species, with the gene name under each tree and  
961 bootstrapping values at each node. Trees that show separate clustering of Z- or W- linked  
962 gametologs provide strong evidence that these genes suppressed recombination before the  
963 speciation.

964

965 **Supplementary Figure 11.** Gene trees for Z and W linked gametologs in S2 region.

966

967 **Supplementary Figure 12.** Gene trees for Z and W linked gametologs in S3 region.

968

969 **Supplementary Figure 13.** Comparison of repeat content between viper chrZ and chrW.  
970 TE families were determined based on the combined annotations of Repeatbase,  
971 RepeatModeler, and coverage in the genome was annotated using in-house scripts.

972

973 **Supplementary Figure 14.** Comparison of gene expression across different  
974 chromosomes.

975 We show gene expression patterns between different chromosome sets across tissues.  
976 ‘pseudo-W’ refers to W-linked genes that have premature stop codons or frameshift  
977 mutations

978

979 **Supplementary Figure 15.** Pairwise comparison of gene expression levels between  
980 homologous Z and W alleles.

981

982 **Supplementary Figure 16.** Gene expression along the Z chromosome and autosome  
983 chr5 in different tissues of five-pacer viper.

984 We show log-based male-to-female gene expression ratio along the Z chromosomes and

985 autosome chr5. Only genes with RPKM  $\geq 1$  in both the male and female were  
986 considered. If genes are mostly non-biased, the line is expected to be centered at 0. The  
987 pattern indicates five-pacer viper lacks chromosome-wide dosage compensation.

988

989 **Supplementary Figure 17.** Frequency distribution of sequencing depth.  
990 Distribution of sequencing depth of the assembled female (left) and male (right) genomes  
991 by reads from the female and male samples. The peak depth is 76X and 77X for the  
992 female and male reads aligned to corresponding assembly, respectively.

993

994 **Supplementary Figure 18.** Comparisons of gene parameters among the sequenced  
995 representative species.

996 We used the published genomes of *Gallus gallus*, *Homo sapiens*, *Anolis carolinensis*,  
997 *Boa constrictor* to compare with *Deinagkistrodon acutus*, without finding any obvious  
998 differences between them and five-pacer viper in the annotated genes' length and number.  
999 This indicates the high quality of gene annotation.

1000

1001 **Supplementary Table Legend**

1002 **Supplementary Table 1.** Statistics of five-pacer viper genome sequencing.

1003

1004 **Supplementary Table 2.** Statistics of 17-mer analysis.

1005

1006 **Supplementary Table 3.** Statistics of reads of small-insert and large-insert libraries  
1007 aligned to the male assembly.  
1008 *PE mapped* refer to reads being mapped to the genome as read pairs, and *SE mapped*  
1009 represent reads being mapped to the genome as single reads.

1010

1011 **Supplementary Table 4.** Summary of the five-pacer viper genome assemblies.

1012

1013 **Supplementary Table 5.** Number of expressed genes of five-pacer viper.

1014

1015 **Supplementary Table 6.** Number of genes and scaffold size organized into  
1016 chromosomes.

1017

- 1018 **Supplementary Table 7.** Comparison of repeat content between snakes and lizard.  
1019
- 1020 **Supplementary Table 8.** Comparison of genome assembly quality between snakes and  
1021 lizard.  
1022
- 1023 **Supplementary Table 9.** Evolution of candidate limb-patterning genes in snakes.  
1024 Candidate limb-patterning genes were collected from MGI database and published paper.  
1025 Genes undergoing positive selection (**P**) or relaxed selective constraints (**R**), were  
1026 identified by PAML analyses. N: there is no significant selection signal. ‘-‘ refers to  
1027 genes that cannot be completely assembled for their coding sequences due to genome  
1028 assembly gaps.  
1029
- 1030 **Supplementary Table 10. Comparison of venom genes between snakes.**  
1031 Statistics of venom gene families in the four snakes and anole lizard genomes based on  
1032 homology-based prediction. AVIT: Prokineticin; C3: complement C3; CVF: Cobra  
1033 Venom Factor; CRISPs: Cysteine-Rich Secretory Proteins; Hy: Hyaluronidases;  
1034 Natriuretic: Natriuretic peptide; NGF: Snake Venom Nerve Growth Factors; PLA2-2A:  
1035 Snake Venom Phospholipase A2 (type IIA); SVMP: Snake Venom Metalloproteinases;  
1036 TL: thrombin-like snake venom serine proteinases; LAAO: Snake Venom L-Amino Acid  
1037 Oxidases; PDE: phosphodiesterases; CLPs: snake C-type lectin-like proteins; VEGF:  
1038 vascular endothelin growth factor; PLA2-1B: Snake Venom Phospholipase A2 (type IB);  
1039 3FTX: The three-finger toxins; ACeH: Acetylcholinesterase;  
1040
- 1041 **Supplementary Table 11.** Comparison of repeat content between snake sex  
1042 chromosomes and their lizard homolog.  
1043
- 1044 **Supplementary Table 12.** Location of W-linked putative pseudogenes.  
1045
- 1046 **Supplementary Table 13.** Fractions of bases covered by reads in the male assembly.  
1047
- 1048 **Supplementary Table 14.** Characteristics of predicted protein-coding genes in the male

1049 assembly.

1050

1051 **Supplementary Table 15.** Number of predicted genes that can find homologs in the

1052 Ensembl library with different aligning rate cutoff.

1053 Alignment rate was calculated by dividing the aligned length vs. the original protein

1054 length. And we required both the query and subject to satisfy our alignment cutoff. The

1055 Ensembl library consists of all proteins from *Anolis carolinensis*, *Gallus gallus*, *Homo*

1056 *sapiens*, *Xenopus tropicalis* and *Danio rerio*.

1057

1058 **Supplementary Table 16.** Data production and alignment statistic of RNA-Seq aligned

1059 to male genome assembly.

1060

1061 **Supplementary Table 17.** Statistics of the identified Z-linked scaffolds.

1062

1063 **Supplementary Table 18.** Statistics of SNPs identified in the female and male

1064 individual.

1065

1066 **Supplementary Table 19.** Statistics of identified W-linked scaffolds.

1067

1068 **Supplementary Data Legend**

1069 **Supplementary Data 1**

1070 Comparing five-pacer viper's chromosomal assignment vs. reported fluorescence in situ

1071 hybridization results.

1072

1073 **Supplementary Data 2**

1074 GO enrichment of nearby genes of TE highly expressed in brain.

1075

1076 **Supplementary Data 3**

1077 Positively selected genes (PSGs) and genes with relaxed selective constraints (RSGs) and

1078 their affected lineage.

1079

1080 **Supplementary Data 4**

1081 Mouse mutant terms' enrichment analyses of PSGs and RSGs across different snake  
1082 branches.

1083

#### 1084 **Supplementary Data 5**

1085 GO enrichment of expanded and contracted gene families across different snake lineages.

1086

#### 1087 **Supplementary Data 6**

1088 Plots of GO enrichment of expanded and contracted gene families using Ontologizer.

1089

#### 1090 **Acknowledgement**

1091 We would like to thank Ren-jie Wang for sharing the snake photo, and three anonymous  
1092 reviewers for their valuable comments. This project was supported by the Thousand  
1093 Young Talents Program funding, and a startup funding of Life Science Institute of  
1094 Zhejiang University to Q. Z., and National Major Scientific and Technological Special  
1095 Project for 'Significant New Drugs Development' during the Twelfth Five-year Plan  
1096 Period (No. 2009ZX09102-217, 2009-2010) to W. Y. All the raw reads, genome  
1097 assembly and annotation generated in this study are deposited under the BioProject #  
1098 PRJNA314370 on NCBI.

1099

#### 1100 **Author Contribution**

1101 Q.Z., W.Y., G.Y. conceived and supervised the project. B.L., P.Q., W.Z., Y.H. and X.S.  
1102 provided and extracted the samples. Z.L. and B.W. performed the proteomic mass  
1103 spectrometry-based experiment and data analysis. J.L., Z.W. and Y.Z. performed the  
1104 genome assembly and annotation. J.L. and Q.L. designed and performed the  
1105 identification of sex-linked scaffolds. P.Z. performed RNA-seq data analysis. Z.W., L.J.  
1106 and Y.Z. performed the genome evolution analyses. Z.W., Y.Z., L.J. and B.Q. performed  
1107 genes and gene family evolution analyses. Z.W. and L.J. performed the sex chromosome  
1108 evolution analyses. Q.Z., Z.W., G.Z., G.Y. interpreted the results and wrote the  
1109 manuscript. All of the authors read and approved the final manuscript.

1110

1111 **Figure 1.** The comparative genomic landscape of five-pace viper

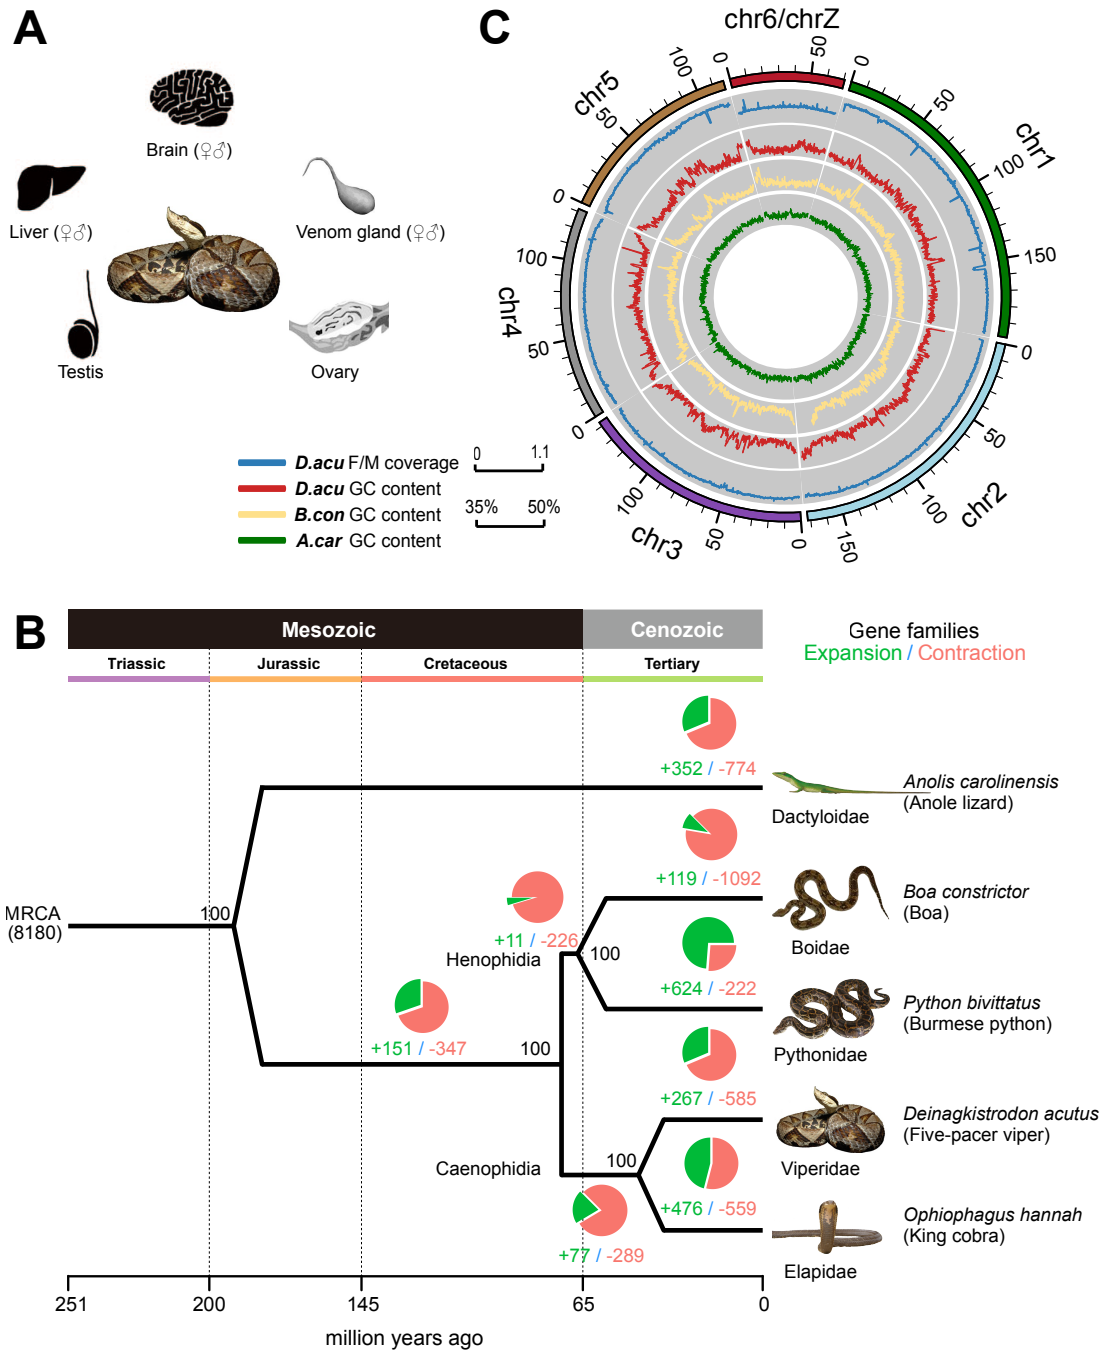

1112

1113

1114 **Figure 2.** Genomic and transcriptomic variation of snake transposable elements

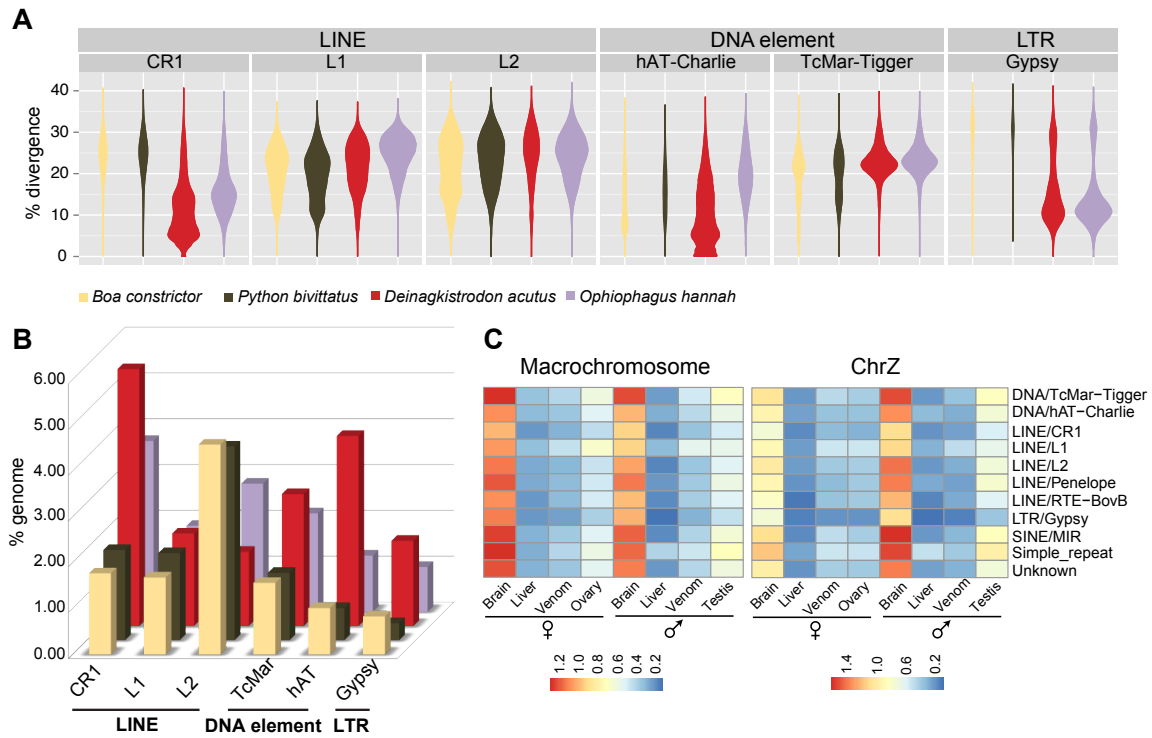

1115

1116



1117 **Figure 3. Evolution of snake genes and gene families**

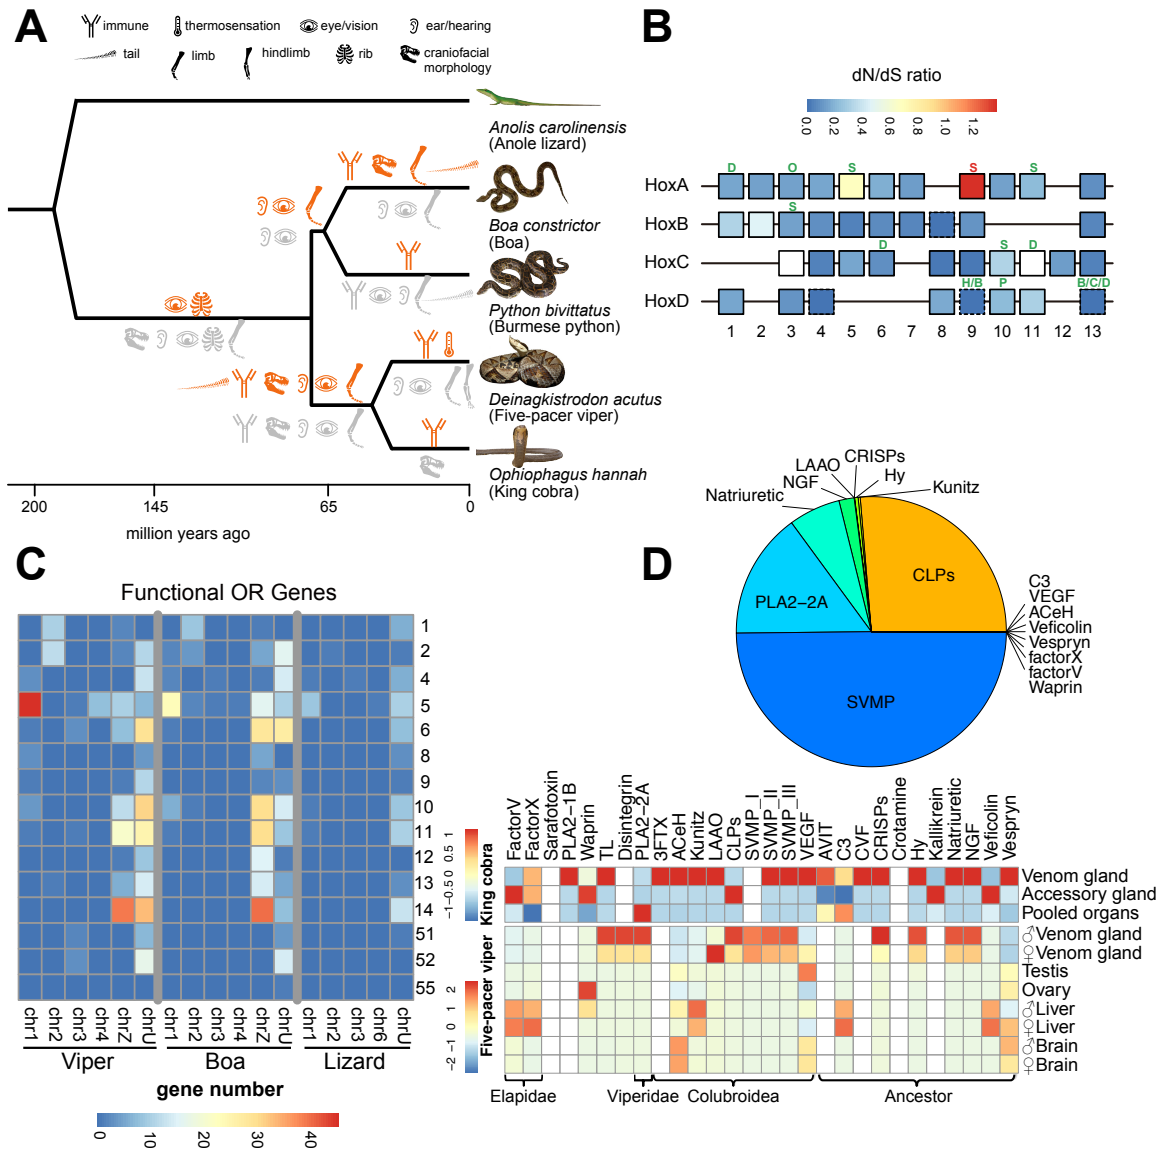

1118

1119 **Figure 4.** Snake sex chromosomes have at least three evolution strata

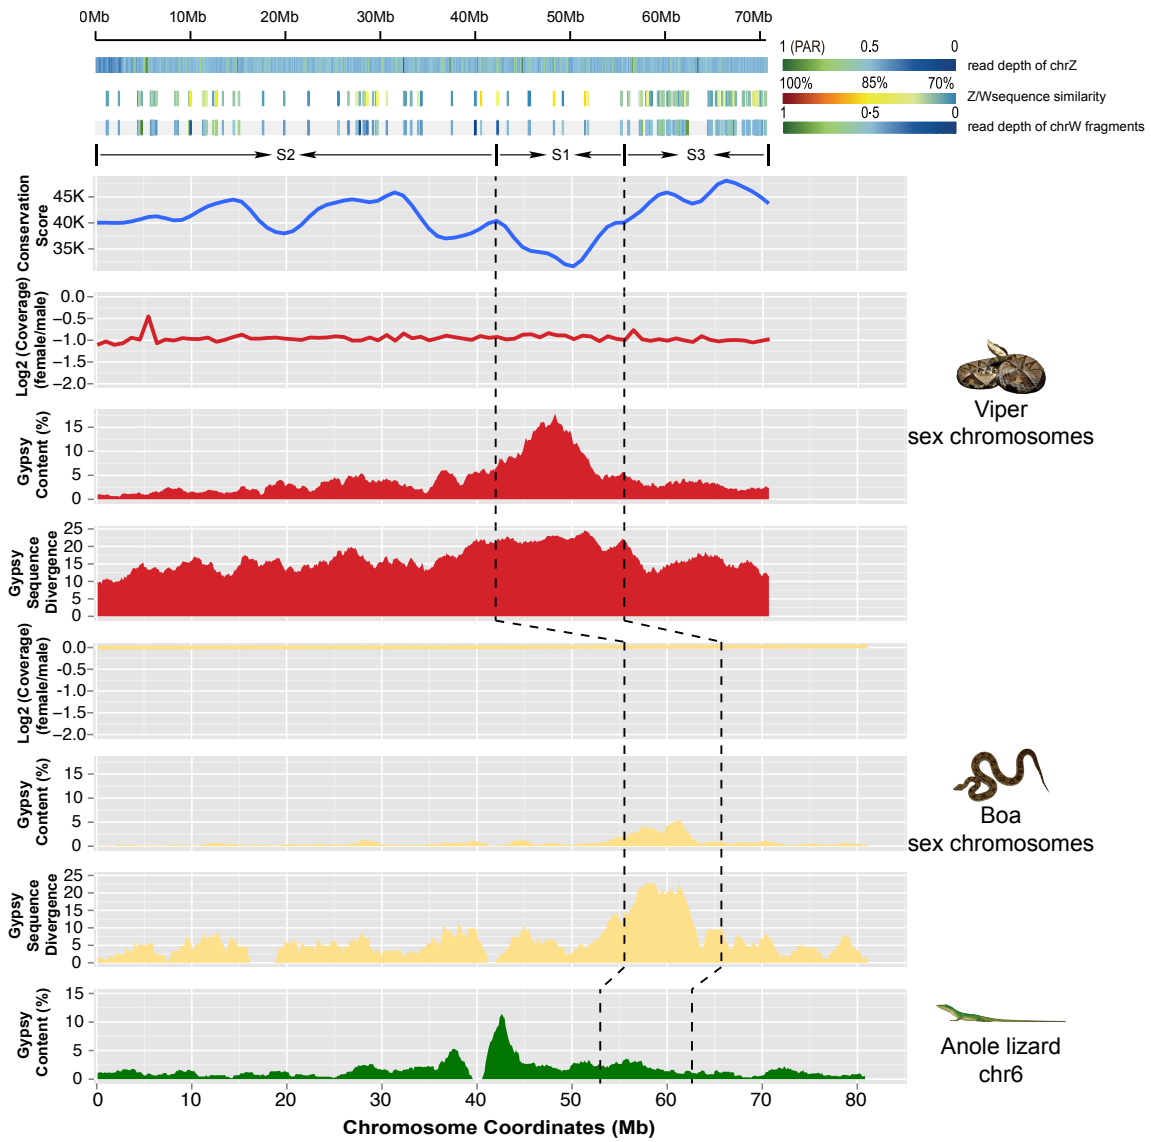

1120
